# Supplementary material for: Multivalent Calixarene-Based Liposomes as Platforms for Gene and Drug Delivery
Source: MDPI journal article supplement (doi:10.3390/pharmaceutics13081250), 2021-08-12
Supplement: s1 [file s1]

# Multivalent Calixarene-Based Liposomes as Platforms for Gene and Drug Delivery

José Antonio Lebrón <sup>1</sup>, Manuel López-López <sup>2</sup>, Clara B. García-Calderón <sup>3</sup>, Ivan V. Rosado <sup>3</sup>, Fernando R. Balestra <sup>4,5</sup>, Pablo Huertas <sup>4,5</sup>, Roman V. Rodik <sup>6</sup>, Vitaly I. Kalchenko <sup>6</sup>, Eva Bernal <sup>1</sup>, María Luisa Moyá <sup>1,\*</sup>, Pilar López-Cornejo <sup>1,\*</sup> and Francisco J. Ostos <sup>1,\*</sup>

<sup>1</sup> Department of Physical Chemistry, Faculty of Chemistry, University of Seville, C/ Profesor García González 1, 41012 Seville, Spain; jlebron@us.es (J.A.L.); evabernal@us.es (E.B.)

<sup>2</sup> Department of Chemical Engineering, Physical Chemistry and Materials Science, Faculty of Experimental Sciences, University of Huelva, Campus de El Carmen, Avda. de las Fuerzas Armadas s/n, 21071 Huelva, Spain; manuel.lopez@diq.uhu.es

<sup>3</sup> Institute of Biomedicine of Seville (IBiS), University Hospital Virgen del Rocío/CSIC/University of Seville, Avda. Manuel Siurot s/n, 41013 Seville, Spain; claragarcia@us.es (C.B.G.-C.); ivrosado@us.es (I.V.R.)

<sup>4</sup> Department of Genetics, Faculty of Biology, University of Seville, C/ Profesor García González 1, 41012 Seville, Spain; fernando.balestra@cabimer.es (F.R.B.); phuertas@us.es (P.H.)

<sup>5</sup> Andalusian Center of Molecular Biology and Regenerative Medicine (CABIMER), University of Seville-CSIC-University Pablo de Olavide, Avda. Américo Vespucio 24, 41092 Seville, Spain; fernando.balestra@cabimer.es (F.R.B.); phuertas@us.es (P.H.)

<sup>6</sup> Institute of Organic Chemistry, National Academy of Science of Ukraine, 02660 Murmanska str. 5, Kiev, Ukraine; dms@ukr.net (R.V.R.); vik@ioch.kiev.ua (V.I.K.)

\* Correspondence: moyá@us.es (M.L.M.); pcornejo@us.es (P.L.C.); fostos@us.es (F.J.O.); Tel.: +34-954557175 (M.L.M.)

## 1. Deduction of Equation (5)<sup>1</sup>

The mass ratio corresponding to neutral liposomes can be written as:

$$\left(\frac{L}{D}\right)_{\phi} = \left(\frac{L^{+} + L^0}{D}\right)_{\phi} \quad (1)$$

The effective charge of a liposome is defined as:

$$Z_{\text{eff}} = \frac{n_{+}}{n_{-}} = \left(\frac{q_{L^{+}}^{+}}{q_{\text{ADN}}^{-}}\right) \times \left(\frac{\left(\frac{L^{+}}{M_L^{+}}\right)}{\left(\frac{D}{M_{\text{bp}}}\right)}\right) \quad (2)$$

When  $Z_{\text{eff}} = 1$ , the ADN mass (D) can be written:

$$D = \left(\frac{q_{L^{+}}^{+}}{q_{\text{ADN}}^{-}}\right) \times \left(\frac{\left(\frac{L^{+}}{M_L^{+}}\right)}{\left(\frac{1}{M_{\text{bp}}}\right)}\right) \quad (3)$$

Equation (4) was obtained by considering Equations (1) and (3):

$$\left(\frac{L}{D}\right)_{\phi} = \frac{(L^{+} + L^0)}{\left(\frac{q_{L^{+}}^{+}}{q_{\text{ADN}}^{-}}\right) \times \left(\frac{\left(\frac{L^{+}}{M_L^{+}}\right)}{\left(\frac{1}{M_{\text{bp}}}\right)}\right)} = \frac{q_{\text{ADN}}^{-}}{q_{L^{+}}^{+}} \times \frac{M_L^{+}}{M_{\text{bp}}} \times \left(\frac{L^{+} + L^0}{L^{+}}\right) = \frac{q_{\text{ADN}}^{-}}{q_{L^{+}}^{+}} \times \frac{M_L^{+}}{M_{\text{bp}}} \times \frac{(n^{+}M_L^{+} + n^0M_L^0)}{n^{+}M_L^{+}} \quad (4)$$

If one multiplies by  $[(n^{+} + n^0)/(n^{+} + n^0)]$ , and introduces the molar fraction  $\alpha$ , Equation (5) is obtained. This equation relates  $(L/D)_{\phi}$  and  $\alpha$ :

$$\left(\frac{L}{D}\right)_{\phi} = \frac{q_{\text{ADN}}^{-}}{q_{L^{+}}^{+}} \times \frac{M_L^{+}}{M_{\text{bp}}} \times \frac{(n^{+}M_L^{+} + n^0M_L^0)}{(n^{+} + n^0)} \times \frac{1}{\left(\frac{n^{+}}{(n^{+} + n^0)}\right)} = \frac{q_{\text{ADN}}^{-}}{q_{L^{+}}^{+}} \times \frac{M_L^{+}}{M_{\text{bp}}} \times \frac{\alpha M_L^{+} + (1-\alpha)M_L^0}{\alpha} \quad (5)$$

ADN 0.5 1 1.5 2 2.5 3 4 5 6 7 8 L/D

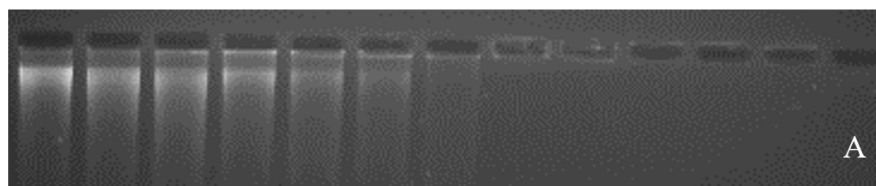

ADN 0.25 0.5 1 2 2.5 3 4 L/D

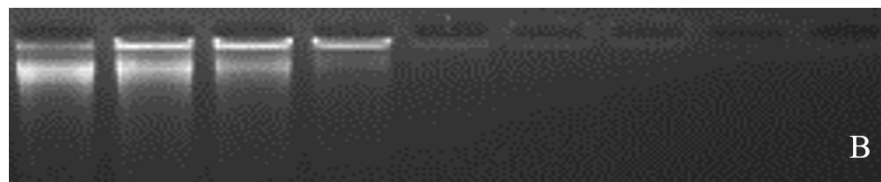

ADN 0.5 1 1.5 2 2.5 3 4 5 6 7 8 L/D

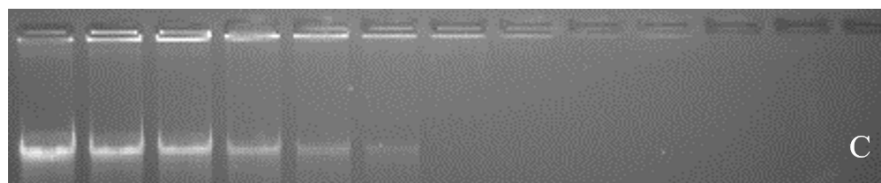

ADN 0.5 0.75 1 2 2.3 2.5 3 4 L/D

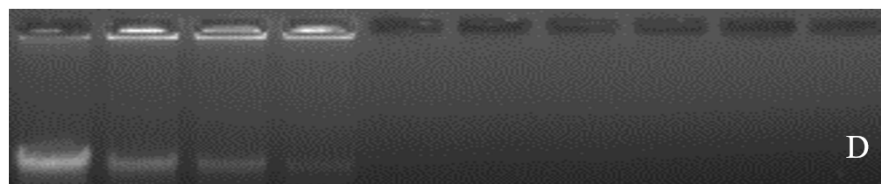

ADN 1 4 6 6.5 7 8 9 10 11 12 14 L/D

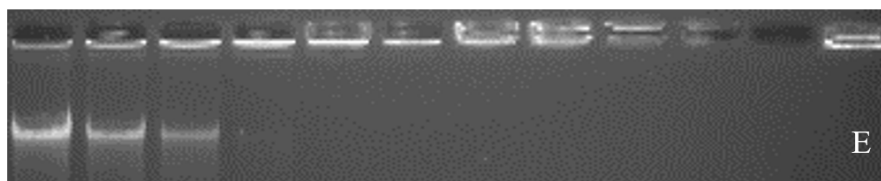

ADN 0.25 0.5 1 1.5 2 2.5 3 4 5 L/D

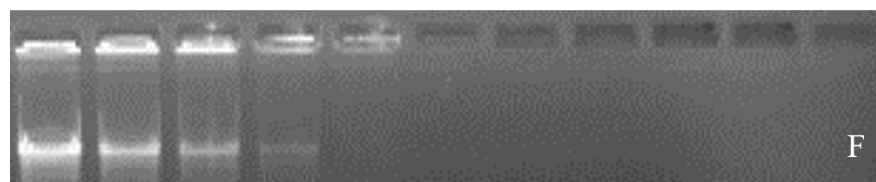

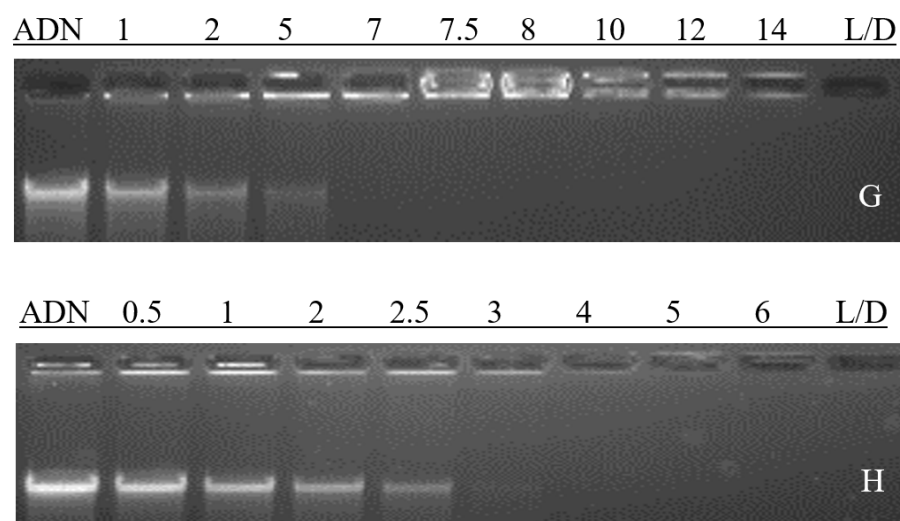

**Figure S1.** Electrophoretic mobility shift assay on an agarose gel (1%) for CAL/DOPE/DNA lipoplexes at different  $\alpha$  values, varying the mass ratio L/D. Experiments were run in TAE buffer (40 mM tris-acetate, 1 mM EDTA) and stained with Red Safe. Electrophoresis was performed at 90 V until completion. (TEAC<sub>12</sub>)<sub>4</sub>: (A)  $\alpha = 0.2$  y (B)  $\alpha = 0.5$ ; (Im<sub>12</sub>)<sub>4</sub>: (C)  $\alpha = 0.2$  y (D)  $\alpha = 0.5$ ; (Im<sub>16</sub>Im<sub>3</sub>)<sub>2</sub>: (E)  $\alpha = 0.1$  y (F)  $\alpha = 0.5$ , and (Im<sub>16</sub>)<sub>4</sub>: (G)  $\alpha = 0.1$  y (H)  $\alpha = 0.3$ .

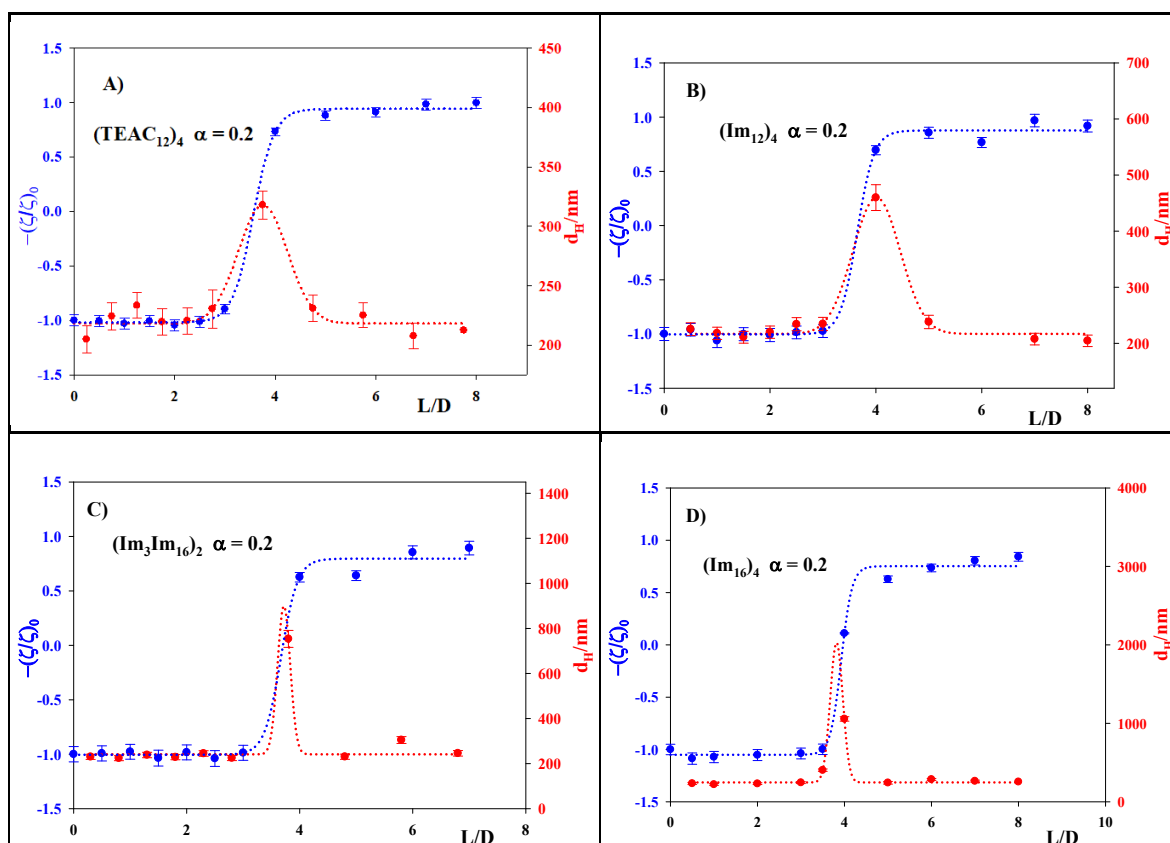

**Figure S2.** Dependence of the relative zeta potential,  $-(\zeta/\zeta_0)$ , and of the hydrodynamic diameter,  $d_H$ , of CAL/DOPE/DNA lipoplexes on L/D for  $\alpha = 0.2$ . T = 303.0.1  $\pm$  0.1 K. (A) (TEAC<sub>12</sub>)<sub>4</sub>; (B) (Im<sub>12</sub>)<sub>4</sub>; (C) (Im<sub>3</sub>Im<sub>16</sub>)<sub>2</sub>; (D) (Im<sub>16</sub>)<sub>4</sub>.

#### Reference:

1. M. Muñoz-Úbeda, S.K. Misra, A.L. Barrán-Berdon, C. Aicart-Ramos, M.B. Sierra, J. Biswas, P. Kondaiah, E. Junquera, S. Bhattacharya, E. Aicart, *J. Am. Chem. Soc.* **2011**, *133*, 18014–18017. <https://doi.org/10.1021/ja204693f>.
